# Supplementary material
Source: Springer Nature journal article supplement (https://www.springermedizin.de/resource/supplementary/12872_2004_39_MOESM4_ESM.pdf/9430932)
Supplement: MOESM4 [file 9430932]

## My Thoughts on the Atrial Fibrillation Decision Aid

We would like to know what you think about the education package you have just reviewed.

- Please circle a number from 1 (poor) to 5 (excellent) to show what you think about the way the information was presented to you.

| Information in the Education Package | How the Information was Presented |           |           |                |                |
|--------------------------------------|-----------------------------------|-----------|-----------|----------------|----------------|
|                                      | 1<br>Poor                         | 2<br>Fair | 3<br>Good | 4<br>Very Good | 5<br>Excellent |
| Atrial Fibrillation                  | 1                                 | 2         | 3         | 4              | 5              |
| Types of Stroke                      | 1                                 | 2         | 3         | 4              | 5              |
| Risks of Stroke                      | 1                                 | 2         | 3         | 4              | 5              |
| Benefits of Medications              | 1                                 | 2         | 3         | 4              | 5              |
| Risks of Medications                 | 1                                 | 2         | 3         | 4              | 5              |
| Stories About Others                 | 1                                 | 2         | 3         | 4              | 5              |

- The length of presentation was (*check ✓ one box*)

too long       too short       just right

- The amount of information was (*check ✓ one box*)

too much       too little       just right

- I found the presentation (*check ✓ one box*)

slanted towards taking warfarin

slanted towards taking aspirin

slanted towards taking nothing

balanced

**K** proceed to next page

5. Would you have found this decision aid useful when you were first making your decision about stroke preventing therapy for atrial fibrillation?

- Yes       No

6. a. What did you think of the personal worksheet? Comments:

---

---

b. Did the worksheet make your decision about stroke preventing therapy

- easier       more difficult       made no difference

7. Do you think we included enough information to help someone decide on stroke-preventing therapy for atrial fibrillation?

- Yes       No

8. What did you like about the decision aid?

---

---

---

---

9. What suggestions do you have to improve the decision aid or worksheet?

---

---

---

---

---
